# Supplementary material for: 2016 Reviewers and Guest Associate Editors
Source: Atypon-hosted journal article supplement (doi:10.1287/mnsc.2017.2723), 2017-02-01
Supplement: mnsc.2017.2723-sm.xlsx [file mnsc.2017.2723-sm.xlsx]

## Sheet: Sheet1
Full name	Institution
Abbas, Ali	University of Illinois at Urbana-Champaign
Abbasi, Ahmed	University of Virginia
Abbink, Klaus	Monash University
Abdellaoui, Mohammed	HEC Paris
Abeler, Johannes	University of Oxford
Abhishek, Vibhanshu	Carnegie Mellon University
Acharya, Viral	New York University
Acimovic, Jason	Pennsylvania State University
Acland, Daniel	University of California, Berkeley
Acquisti, Alessandro	Carnegie Mellon University
Adamopoulos, Panagiotis	University of Minnesota Twin Cities
Addoum, Jawad	Cornell University
Adelino, Manuel	Duke University
Adida, Elodie	University of California, Riverside
Adjerid, Idris	University of Notre Dame
Afeche, Philipp	University of Toronto
Aflaki, Sam	HEC Paris
Agarwal, Ashish	University of Texas at Austin
Agarwal, Vikas	Georgia State University
Aggarwal, Rajesh	Northeastern University
Aggarwal, Rohit	University of Utah
Aggarwal, Vikas	INSEAD
Agha, Leila	Boston University
Aghamolla, Cyrus	University of Minnesota Twin Cities
Agnew, Julie	College of William and Mary
Agrawal, Anup	University of Alabama
Agrawal, Anupam	Texas A&M University
Agrawal, Ashwini	London School of Economics
Agrawal, Shipra	Columbia University
Agrawal, Vishal	Georgetown University
Aguilera, Ruth	Northeastern University
Ahern, Kenneth	University of Michigan
Ahuja, Vishal	Southern Methodist University
Ai, Hengjie	University of Minnesota
Aimone, Jason	Baylor University
Akan, Mustafa	Carnegie Mellon University
Akkas, Arzum	Boston University
Aksin, Zeynep	Koc University
Alagoz, Oguzhan	University of Wisconsin-Madison
Alan, Yasin	Vanderbilt University
Albargli, Elias	Central Bank of Chile
Albuquerque, Ana	Boston University
Albuquerque, Paulo	INSEAD
Albuquerque, Rui	Boston College
Alcacer, Juan	Harvard University
Alexander, Gordon	University of Minnesota
Alizamir, Saed	Yale University
Alladi, Vinayak	University of California, San Diego
Allayannis, George	University of Virginia
Allcott, Hunt	New York University
Allen, Abigail	Brigham Young University
Alok, Shashwat	Indian School of Business
Alonso, Ricardo	London School of Economics
Aloysius, John	University of Arkansas
Alptekinoglu, Aydin	Pennsylvania State University
Altmann, Steffen	University of Copenhagen
Al-Ubaydli, Omar	George Mason University
Amaldoss, Wilfred	Duke University
Ambler, Kate	International Food Policy Research Institute
Ambrose, Brent	Pennsylvania State University
Ambuehl, Sandro	Stanford University
Amir, On	University of California, San Diego
Amiram, Dan	Columbia University
Amore, Mario Daniele	Bocconi University
Amromin, Gene	Federal Reserve Bank of Chicago
An, Li	Tsinghua University
Anand, Amber	Syracuse University
Anand, Gopesh	University of Illinois
Anand, Krishnan	University of Utah
Anantharaman, Divya	Rutgers University
Andersen, Steffen	Copenhagen Business School
Anderson, David	Baruch College
Andersson, Frederik	Office of the Comptroller of the Currency
Andrade, Eduardo	FGV
Andrade, Sandro	University of Miami
Andrews, Michelle	Emory University
Andritsos, Dimitrios	HEC Paris
Angel, James	Georgetown University
Angelucci, Charles	Columbia University
Anglin, Paul	University of Guelph
Angst, Corey	University of Notre Dame
Animesh, Animesh	McGill University
Anjos, Fernando	Nova School of Business and Economics
Anthonisz, Sean	University of Technology Sydney
Antognini, Alessandro	University of Bologna
Aobdia, Daniel	Northwestern University
Aragon, George	Arizona State University
Aral, Sinan	Massachusetts Institute of Technology
Araman, Victor	American University of Beirut
Arbatskaya, Maria	Emory University
Aribarg, Anocha	University of Michigan
Arifoglu, Kenan	University College London
Arikan, Asli	Georgia State University
Arikan, Mazhar	University of Kansas
Arlotto, Alessandro	Duke University
Armony, Mor	New York University
Armstrong, Christopher	University of Pennsylvania
Arnosti, Nick	Stanford University
Arts, Joachim	Eindhoven University of Technology
Asadpour, Arash	New York University
Ascarza, Eva	Columbia University
Ashbaugh Skaife, Hollis	University of California, Davis
Ashlagi, Itai	Stanford University
Asparouhova, Elena	University of Utah
Aswani, Anil	University of California Berkeley
Atahan, Pelin	Özyeğin University
Atanassov, Julian	University of Nebraska
Atasoy, Hilal	Temple University
Atasu, Atalay	Georgia Institute of Technology
Attema, Arthur	Erasmus University
Augenblick, Ned	University of California, Berkeley
Avdis, Efstathios	University of Alberta
Aven, Brandy	Carnegie Mellon University
Avraham, Ebenstein	Hebrew University of Jerusalem
Ayabakan, Sezgin	University of Baltimore
Aydin, Goker	Indiana University
Ayer, Turgay	Georgia Institute of Technology
Ayotte, Kenneth	University of California, Berkeley
Aytug, Haldun	University of Florida
Ayvaci, Mehmet	University of Texas at Dallas
Azevedo, Eduardo	University of Pennsylvania
Azmat, Ghazala	Queen Mary University of London
Babenko, Ilona	Arizona State University
Babich, Volodymyr	Georgetown University
Babina, Tania	Columbia University
Bach, Laurent	Stockholm School of Economics
Back, Kerry	Rice University
Backus, Mathew	Columbia University
Badarinza, Cristian	National University of Singapore
Baddeley, Michelle	University College London
Baele, Lieven	Tilburg University
Baghai, Ramin	Stockholm school of economics
Baginski, Steve	University of Georgia
Bagnoli, Mark	Purdue University
Bai, Jennie	Georgetown University
Bai, John	Northeastern University
Bailey, Warren	Cornell University
Baillon, Aurelien	Erasmus University
Baird, Aaron	Georgia State University
Baker, Malcolm	Harvard University
Baker, Steven	University of Virginia
Bakshi, Gurdip	University of Maryland
Bakshi, Nitin	University of Utah
Balachander, Subramanian	Purdue University
Balafoutas, Loukas	University of Innsbruck
Balakrishnan, Karthik	London Business School
Balasubramanian, Natarajan	Syracuse University
Balduzzi, Pierluigi	Boston College
Bali, Turan	Georgetown University
Balinski, Michel	Ecole Polytechnique
Ball, George	Indiana University
Balseiro, Santiago	Duke University
Bandi, Chaitanya	Northwestern University
Bandyopadhyay, Subhajyoti (Subho)	University of Florida
Banerjee, Snehal	Northwestern University
Bansal, Saurabh	Pennsylvania State University
Banuri, Sheheryar	University of East Anglia
Bao, Jack	Federal Reserve Board
Bao, Yang	Shanghai Jiao Tong University
Baranchuk, Nina	University of Texas at Dallas
Barberis, Nicholas	Yale University
Bar-Gill, Sagit	Massachusetts Institute of Technology
Barker, Vincent	University of Kansas
Baron, Justus	Northwestern University
Baron, Opher	University of Toronto
Barone-Adesi, Giovanni	University of Lugano
Barras, Laurent	McGill University
Barroso, Pedro	University of New South Wales
Barrot, Jean-Noel	Massachusetts Institute of Technology
Bartel, Ann	Columbia University
Bartling, Björn	University of Zurich
Bastin, Fabian	University of Montreal
Bates, David	University of Iowa
Batt, Robert	University of Wisconsin-Madison
Battiston, Stefano	University of Zurich
Bauer, Michal	Charles University
Baumann, Oliver	University of Southern Denmark
Bavafa, Hessam	University of Pennsylvania
Bayer, Ralph	University of Adelaide
Bearden, J. Neil	INSEAD
Beare, Brendan	University of California, San Diego
Beatty, Anne	The Ohio State University
Becher, David	Drexel University
Bedre-Defolie, Ozlem	European School of Management and Technology
Beer, Ruth	Indiana University
Begen, Mehmet	Western University
Begenau, Juliane	Harvard University
Begley, Taylor	London Business School
Bekker, René	VU University
Belavina, Elena	University of Chicago
Bellemare, Charles	Université Laval
Belo, Frederico	University of Minnesota
Belo, Rodrigo	Erasmus University
Belot, Michele	University of Edinburgh
Belotti, Pietro	FICO
Bena, Jan	University of British Columbia
Ben-David, Itzhak	The Ohio State University
Bengui, Julien	University of Montreal
Benjamin, Daniel	University of Southern California
Benndorf, Volker	Duesseldorf Institute for Competition Economics
Bennett, Victor	Duke University
Bens, Daniel	INSEAD
Bentley, Taylor	University of Texas at Austin
Benzoni, Luca	University of Minnesota
Berchicci, Luca	Erasmus University
Bercovitz, Janet	University of Illinois at Urbana-Champaign
Berente, Nicholas	University of Georgia
Bereskin, Frederick	University of Delaware
Berger, Sebastian	University of Bern
Bergstresser, Daniel	Brandeis University
Bergstrom, Ted	University of California, Santa Barbara
Berman, Jonathan	London Business School
Berman, Ron	University of Pennsylvania
Bermiss, Sekou	University of Texas
Berndt, Antje	North Carolina State University
Bernstein, Shai	Stanford University
Berri, David	Southern Utah University
Berrone, Pascual	IESE Business School
Berry Jaeker, Jillian	Boston University
Bertomeu, Jeremy	Baruch College
Besbes, Omar	Columbia University
Besiou, Maria	Kuhne Logistics University
Bessen, James	Research on Innovation
Bhagat, Sanjai	University of Colorado
Bharath, Sreedhar	Arizona State University
Bhardwaj, Pradeep	University of Central Florida
Bhargava, Hemant	University of California, Davis
Bhaskarabhatla, Ajay	Erasmus University
Bhat, Gauri	Southern Methodist University
Bhatia, Sudeep	University of Pennsylvania
Bhattacharjee, Sudip	University of Connecticut
Bhattacharya, Jay	Stanford University
Bhattacharya, Shantanu	Lee Kong Chian School of Business
Bianchi, Emily	Emory University
Bidwell, Matthew	University of Pennsylvania
Biffis, Enrico	Imperial College London
Bigio, Saki	University of California, Los Angeles
Bikard, Michael	London Business School
Billings, Mary	New York University
Bimpikis, Kostas	Stanford University
Birru, Justin	The Ohio State University
Biyalogorsky, Eyal	IDC Herzliya
Bizjak, John	Texas Christian University
Bjorvatn, Kjetil	Norwegian School of Economics
Black, Dirk	Dartmouth College
Blanchet, Jose	Columbia University
Blanco, Mariana	del Rosario University
Blankespoor, Elizabeth	Stanford University
Blasco, Andrea	Harvard University
Blavatskyy, Pavlo	Murdoch University
Bleier, Alexander	Boston College
Blocher, Jesse	Vanderbilt University
Blume, Andreas	University of Arizona
Boatwright, Peter	Carnegie Mellon University
Bockenholt, Ulf	Northwestern University
Bockstedt, Jesse	University of Arizona
Bodur, Merve	Georgia Institute of Technology
Boguth, Oliver	Arizona State University
Bohme, Rainer	University of Münster
Bollen, Nicolas	Vanderbilt University
Bollinger, Bryan	Duke University
Bolton, Gary	University of Texas at Dallas
Bolton, Lisa	Pennsylvania State University
Bolton, Patrick	Columbia University
Bonami, Pierre	International Business Machines
Bonatti, Alessandro	Massachusetts Institute of Technology
Bonein, Aurélie	University Rennes 1 - CREM
Bonet, Rocio	IE Business School
Bonsall, Samuel	The Ohio State University
Boone, Audra	U.S. Securities and Exchange Commision
Borgonovo, Emanuele	Bocconi University
Borilo, Danil	Stanford University
Borovicka, Jaroslav	New York University
Borst, Sem	Eindhoven University of Technology
Bortolotti, Stefania	Universitat zu Koln Wirtschafts- und Sozialwissenschaftliche Fakultat
Botelho, Tristan	Massachusetts Institute of Technology
Bothner, Matthew	European School of Management and Technology
Boucher, Vincent	Universite Laval
Boudreau, Kevin	Northeastern University
Bourreau, Marc	Telecom ParisTech
Bouvard, Matthieu	McGill University
Bouwman, Christa	Texas A&M University
Bova, Francesco	University of Toronto
Bowers, Anne	University of Toronto
Boyabatli, Onur	Singapore Management University
Boyaci, Tamer	McGill University
Boyer, Brian	Brigham Young University
Boyson, Nicole	Northeastern University
Bozanic, Zahn	The Ohio State University
Bracha, Anat	The Federal Reserve Bank of Boston
Braguinsky, Serguey	University of Maryland, College Park
Brahm, Francisco	University of Cambridge
Brams, Steven	New York University
Brandimarte, Laura	University of Arizona
Brandon, Alec	University of Chicago
Brandts, Jordi	Barcelona Graduate School of Economics
Branstetter, Lee	Carnegie Mellon University
Braun, Michael	Southern Methodist University
Bray, Robert	Stanford University
Brenner, Lyle	University of Florida
Brenner, Steffen	Copenhagen Business School
Brescoll, Victoria	Yale University
Breza, Emily	Columbia University
Bris, Arturo	IMD
Brochet, Francois	Boston University
Brock, Michelle	European Bank for Reconstruction and Development
Brockman, Paul	Lehigh University
Bronnenberg, Bart	Tilburg University
Brown, Alexander	Texas A&M University
Brown, David	Duke University
Brown, James	Iowa State University
Brown, Jennifer	University of British Columbia
Brusa, Francesca	Temple University
Bryan, Christopher	University of California, San Diego
Bryan, Kevin	University of Toronto
Bryzgalova, Svetlana	Stanford University
Budescu, David	Fordham University
Buechel, Berno	University of St. Gallen
Buell, Ryan	Harvard University
Buffa, Andrea	Boston University
Buffat, Justin	University of Cologne
Bulte, Erwin	Wageningen University
Bundy, Jonathan	Pennsylvania State University
Bunkanwanicha, Pramuan	ESCP Europe
Burbano, Vanessa	Columbia University
Burkart, Mike	Stockholm School of Economics
Burtch, Gordon	University of Minnesota
Buser, Thomas	University of Amsterdam
Buskens, Vincent	Utrecht University
Buss, Adrian	INSEAD
Bustamante, Maria	University of Maryland, College Park
Butenko, Sergiy	Texas A&M University
Byzalov, Dmitri	Temple University
Cabral, Luis	New York University
Cabrales, Antonio	Charles III University of Madrid
Cacho-Diaz, Julio	Quantor Capital LLC
Cachon, Gerard	University of Pennsylvania
Cai, Cexun	Texas A&M University
Cai, Jay	Drexel University
Cai, Jian	Washington University in Saint Louis
Cai, Jie	Drexel University
Cain, Daylian	Yale University
Cakici, Nusret	Fordham University
Caldentey, Rene	The University of Chicago
Caldieraro, Fabio	FGV EBAPE - Rio de Janeiro
Campbell, Benjamin	The Ohio State University
Candogan, Ozan	University of Chicago
Caplice, Chris	Massachusetts Institute of Technology
Caplin, Andrew	New York University
Cappelen, Alexander	Norwegian School of Economics
Cappelli, Peter	University of Pennsylvania
Capponi, Agostino	Columbia University
Carletti, Elena	Bocconi University
Carnabuci, Gianluca	University of Lugano
Carnahan, Seth	University of Michigan
Carney, Dana	University of California, Berkeley
Caro, Felipe	University of California, Los Angeles
Carr, Peter	New York University
Carre, Justin	Nipissing University
Carroll, Glenn	Stanford University
Carter, Mary Ellen	Boston College
Carter, Mary	Boston College
Carvalho, Daniel	University of Southern California
Casey, Katherine	Stanford University
Caskey, Judson	University of California, Los Angeles
Caskurlu, Tolga	University of Amsterdam
Cason, Timothy	Purdue University
Cassar, Gavin	INSEAD
Cassar, Lea	University of Zurich
Castellaneta, Francesco	Catolica Lisbon School of Business and Economics
Castillo, Marco	George Mason University
Catalini, Christian	Massachusetts Institute of Technology
Cavagnaro, Daniel	California State University Fullerton
Ceccagnoli, Marco	Georgia Institute of Technology
Cen, Ling	University of Toronto
Cenfetelli, Ronald	University of British Columbia
Cerreia-Vioglio, Simone	Bocconi University
Chabakauri, Georgy	London School of Economics
Chabi-Yo, Fousseni	The Ohio State University
Chadwick, Clint	University of Kansas
Chaigneau, Pierre	HEC Montreal
Chakrabarty, Bidisha	Saint Louis University
Chalfin, Aaron	University of Pennsylvania
Chalmers, John	University of Oregon
Chan, Carri	Columbia University
Chan, Jason	University of Minnesota
Chance, Zoe	Yale University
Chandon, Pierre	INSEAD
Chandrasekaran, Aravind	The Ohio State University
Chang, Bo Young	Bank of Canada
Chang, Tom	University of Southern California
Chang, Yen-cheng	National Taiwan University
Chao, Raul	University of Virginia
Chao, Xiuli	University of Michigan
Charkhgard, Hadi	University System of Georgia
Chatain, Olivier	HEC Paris
Chatterjee, Kalyan	Pennsylvania State University
Chatterji, Aaron	Duke University
Chaturvedi, Aadhaar	University of Namur
Chava, Sudheer	Georgia Institute of Technology
Che, Hai	Indiana University in Bloomington
Cheema, Amar	University of Virginia
Chehrazi, Naveed	University of Texas at Austin
Chemla, Gilles	Imperial College London
Chen , Zhijun	Monash University
Chen, Bo	University of Warwick
Chen, Boxiao	University of Michigan
Chen, Caihua	Nanjing University
Chen, Clara	University of Illinois at Urbana-Champaign
Chen, Frank	Chinese University of Hong Kong
Chen, Hailiang	City University of Hong Kong
Chen, Haipeng (Allan)	Texas A&M University
Chen, Hua	University System of Georgia
Chen, Jianqing	University of Texas at Dallas
Chen, Jing	Copenhagen Business School
Chen, John	University of Florida
Chen, Joseph	University of California, Davis
Chen, Kay-Yut	University of Texas at Arlington
Chen, Li	Cornell University
Chen, Liwen	City University of Hong Kong
Chen, Lucy	National University of Singapore
Chen, Mark	Georgia State University
Chen, Nan	Chinese University of Hong Kong
Chen, Qi	Duke University
Chen, Rachel	University of California, Davis
Chen, Roy	University of Michigan
Chen, Shi	University of Washington
Chen, Wei	University of Arizona
Chen, Xi	New York University
Chen, Xinlei	Shanghai Advanced Institution of Finance
Chen, Yiling	Harvard University
Chen, Ying-Ju	Hong Kong University of Science and Technology
Chen, Yiwei	Massachusetts Institute of Technology
Chen, Yong	Texas A&M University
Chen, Yudong	Cornell University
Chen, Zhaohui	University of Virginia
Chen, Zhi-Long	University of Maryland
Cheng, Ing-Haw	Dartmouth College
Cheng, Mengyao	Boston College
Cheng, Si	National University of Singapore
Cheng, Zhuo (June)	Hong Kong Polytechnic University
Cheung, Mike	National University of Singapore
Cheung, Stephen	The University of Sydney
Cheynel, Edwige	Columbia University
Chick, Stephen	INSEAD
Ching, Andrew	University of Toronto
Chiou, Lesley	Occidental College
Chiu, W. Henry	University of Manchester
Cho, Soo-Haeng	Carnegie Mellon University
Chod, Jiri	Boston College
Choi, Darwin	Hong Kong University of Science and Technology
Choi, Dong Beom	Federal Reserve Bank of New York
Choi, Willie	University of Pittsburgh
Chordia, Tarun	Emory University
Chou, Mabel	National University of Singapore
Choudhary, Preeti	Georgetown University
Chowdhury, Subhasish	University of East Anglia
Christelis, Dimitris	European Central Bank
Christian, Michael	University of North Carolina at Chapel Hill
Christoffersen, Peter	University of Toronto
Chu, Jenny	University of Cambridge
Chu, Johan	University of Chicago
Chu, Leon	University of Southern California
Chu, Yongqiang	University of South Carolina
Chugh, Dolly	New York University
Chun, Albert	University of Queensland
Chun, So Yeon	Georgetown University
Chung, Doug	Harvard University
Chung, Kevin	University of Wisconsin-Madison
Cicero, David	University of Alabama
Cici, Gjergji	College of William and Mary
Cillo, Alessandra	Bocconi University
Ciocan, Florin	Massachusetts Institute of Technology
Clark, Jonathan	Pennsylvania State University
Coates, Jon	University of Cambridge
Cobo-Reyes, Ramon	University of Essex
Coffman, Katherine	The Ohio State University
Coffman, Lucas	The Ohio State University
Cohen, Lisa	McGill University
Cohen, Maxime	New York University
Cohen, Taya	Carnegie Mellon University
Cohen-Charash, Yochi	Baruch College
Cohn, Alain	University of Chicago
Cohn, Jonathan	University of Texas at Austin
Coles, Jeffrey	University of Utah
Colliard, Jean-Edouard	HEC Paris
Colombo, Massimo	Politecnico di Milano
Conejo, Antonio J.	The Ohio State University
Cong, Will	University of Chicago
Conlon, Chris	New York University
Conti, Annamaria	Georgia Institute of Technology
Cookson, J. Anthony	University of Colorado at Boulder
Cooper, Ryan	Washington University in St. Louis
Cooper, William	University of Minnesota
Corgnet, Brice	EM Lyon
Coricelli, Giorgio	University of Southern California
Cornaggia, Jess	Georgetown University
Cornaggia, Kimberly	American University
Costello, Anna	Massachusetts Institute of Technology
Coviello, Decio	HEC Montreal
Craig, Ashley	Harvard University
Craig, Nathan	The Ohio State University
Crainich, David	The French National Center for Scientific Research
Crama, Pascale	Singapore Management University
Crane, Alan	Rice University
Crawford, Vincent	University of California, San Diego
Crawley, Mike	Indiana University
Cremers, Martijn	University of Notre Dame
Crilly, Donal	London Business School
Critcher, Clayton	University of California, Berkeley
Croce, Mariano	University of North Carolina at Chapel Hill
Cronin, Matthew	George Mason University
Cronqvist, Henrik	Henrik Cronqvist University of Miami
Crossland, Craig	University of Notre Dame
Crump, Richard	Federal Reserve Bank of New York
Csaszar, Felipe	University of Michigan
Cui, Geng	Lingnan University
Cui, Ruomeng	Indiana University
Cui, Shiliang	Georgetown University
Cui, Tony	University of Minnesota
Cui, Yao	Cornell University
Cujean, Julien	University of Maryland
Cumming, Douglas	York University
Cummings, Jonathon	Duke University
Cunat, Vicente	London School of Economics
Cunha, Marcus	University of Georgia
Cunningham, Tom	Insurance Information and Enforcement System
Cuny, Christine	New York University
Cziraki, Peter	University of Toronto
da Costa Jr., Newton	Federal University of Santa Catarina
Da, Zhi	University of Notre Dame
Dahl, Michael S.	Aarhus University
Dai, Hengchen	Washington University in Saint Louis
Dai, Min	National University of Singapore
Dai, Tinglong	Johns Hopkins University
Dai, Zhonglan	University of Texas at Dallas
Daley, Brendan	Duke University
Dana, James	Northeastern University
Dana, Jason	Yale University
Danaher, Brett	University of Pennsylvania
Dangl, Thomas	Vienna University of Technology
Daniel, Naveen	Drexel University
Danz, David	WZB Berlin Social Science Center
Das, Sanjiv	Santa Clara University
Dasgupta, Sudipto	Lancaster University
Daske, Holger	University of Mannheim
David, Joel	University of Southern California
Davidoff, Thomas	University of British Columbia
Davidson, Robert	Georgetown University
Davies, Shaun	University of Colorado at Boulder
Davilla, Antonio	IESE Business School
Davis, Andrew	Cornell University
Davis, Angela	University of Oregon
Davis, Brent	University of Innsbruck
Davis, James	University of Illinois at Urbana-Champaign
Davydenko, Sergei	University of Toronto
De Angelis, David	Rice University
de Corniere, Alexandre	University of Oxford
de cremer, david	University of Cambridge
De Giorgi, Enrico	University of St. Gallen
de Haan, Thomas	Norges Handelshoyskole
de Lara Resende, Jose	University of Brasilia
de los Santos, Babur	Clemson University
De Nicolo, Gianni	International Monetary Fund
de Quidt, Jon	Stockholm University
De Simone, Lisa	Stanford University
De Vaan, Mathijs	University of California Berkeley
Dean, Mark	Columbia University
Decamps, Jean-Paul	Universite Toulouse 1 Capitole Ecole d\'economie de Toulouse
DeCroix, Gregory	University of Wisconsin-Madison
DeFusco, Anthony	Northwestern University
Degryse, Hans	Tilburg University
deHaan, Ed	Stanford University
DeHoratius, Nicole	University of Chicago
Dekker, Henri	VU University
Delasay, Mohammad	Carnegie Mellon University
Delfgaauw, Josse	Erasmus University
Delgado, Mercedes	Temple University
Della Corte, Pasquale	Imperial College London
Dell'Ariccia, Giovanni	International Monetary Fund
DeMiguel, Victor	London Business School
Demirci, Irem	University of Mannheim
Demyanyk, Yuliya	Federal Reserve Bank of Cleveland
den Boer, Arnoud	University of Twente
Deng, Xin	Shanghai University of Finance and Economics
Deng, Xuefei (Nancy)	University of Hawaii at Manoa
Denrell, Jerker	Oxford University
Dentcheva, Darinka	Stevens Institute of Technology
Denton, Brian	University of Michigan
Deo, Sarang	Indian School of Business
Derdenger, Timothy	Carnegie Mellon University
Dertwinkel-Kalt, Markus	Universitat zu Koln Wirtschafts- und Sozialwissenschaftliche Fakultat
Deryugina, Tatyana	University of Illinois
Desai, Hemang	Southern Methodist University
Desai, Preyas	Duke University
Devalkar, Sripad	Indian School of Business
DeVoe, Sanford	University of California, Los Angeles
Dew-Becker, Ian	Northwestern University
Dey, Aiyesha	University of Minnesota
Dezsö, Cristian	University of Maryland
Dhar, Tirtha	University of Guelph
Dhawan, Rajeev	Georgia State University
Di Maggio, Marco	Harvard University
Di Stefano, Giada	HEC Paris
Dickinson, Victoria	University of Mississippi
Dick-Nielsen, Jens	Copenhagen Business School
Diecidue, Enrico	INSEAD
Dierynck, Bart	Tilburg University
Dimmock, Stephen	Nanyang Technological University
Dinc, Serdar	Rutgers University
Ding, Qing	Huazhong University of Science and Technology
Ding, Waverly	University of Maryland
Ding, Yichuan	University of British Columbia
Distaso, Walter	Imperial College London
Dittmar, Amy	University of Michigan
Dittmar, Robert	University of Michigan
Djebbari, Habiba	Aix Marseille University
Dlugosz, Jennifer	Washington University in St. Louis
Dockner, Engelbert	University of Vienna
Doh, Hyunsoo	University of Chicago
Dohmen, Thomas	Rheinische Friedrich Wilhelms Universitat Bonn
Dokko, Gina	University of California, Davis
Doleac, Jennifer	University of Virginia
Dominiak, Adam	Virginia Tech
Donaldson, Jason	Washington University
Donangelo, Andres	University of Texas at Austin
Donelson, Dain	University of Texas
Dong, Lingxiu	Washington University in St. Louis
Dong, Xiaojing	Santa Clara University
Donkers, Bas	Erasmus University
Doran, Kirk	University of Notre Dame
Dorn, Daniel	Drexel University
Dou, Yifan	Fudan University
Dover, Yaniv	Hebrew University of Jerusalem
Draganska, Michaela	Drexel University
Drake, David	INSEAD
Drakopoulos, Kimon	Massachusetts Institute of Technology
Drev, Matej	Georgia Institute of Technology
Driessen, Joost	Tilburg University
driscoll, john	Federal Reserve Board
Du, Donglei	University of New Brunswick
Du, Du	City University of Hong Kong
Du, Rex	University of Houston
Duan, Jason	University of Texas at Austin
Duarte, Jefferson	Rice University
Duchin, Ran	University of Washington
Dudley, Evan	Queen's University
Duenyas, Izak	University of Michigan
Duersch, Peter	University of Heidelberg
Duffy, John	University of California, Irvine
Dufwenberg, Martin	University of Arizona
Dugar, Subhasish	University of Utah
Dukes, Anthony	University of Southern California
Dulleck, Uwe	Queensland University of Technology
Dur, Robert	Erasmus University
Durnev, Artem	University of Iowa
Dutt, Nilanjana	Bocconi University
Dyck, Alexander	University of Toronto
Dyer, James	University of Texas at Austin
Dyreng, Scott	Duke University
Dzyabura, Daria	New York University
Ebert, Jane	Brandeis University
Ebert, Sebastian	Tilburg University
Eckbo, Espen	Dartmouth College
Eckles, Dean	Facebook
Ederer, Florian	Yale University
Eggers, J.P.	New York University
Ehling, Paul	BI Norwegian Business School
Ehrgott, Matthias	Lancaster University
Einhorn, Eti	Tel Aviv University
Eisenberg, Larry	University of Southern Mississippi
Elbanna, Amany	University of London
Elfenbein, Daniel	Washington University in St. Louis
Elkamhi, Redouane	University of Toronto
Ellingsen, Tore	Stockholm School of Economics
Elliott, Marc	RAND Corporation
Ellman, Matthew	Institut d\'Analisi Economica
Ellul, Andrew	Indiana University
Elmachtoub, Adam	Columbia University
Elmaghraby, Wedad	University of Maryland
Emadi, Seyed M.	University of North Carolina at Chapel Hill
Embrey, Matthew	Maastricht University
Emmerling, Johannes	Fondazione Eni Enrico Mattei (FEEM)
Engelmann, Dirk	Humboldt University Berlin
Engl, Florian	University of Cologne
Epper, Thomas	University of St. Gallen
Erat, Sanjiv	University of California, San Diego
Erel, Isil	The Ohio State University
Erhun, Feryal	University of Cambridge
Erkens, David	University of Southern California
Ermolov, Andrey	Fordham University
Erner, Carsten	University of California, Los Angeles
Erol, Selman	University of Pennsylvania
Ertac, Seda	Koc University
Ertan, Emre	University Of Texas at Dallas
Ertimur, Yonca	University of Colorado at Boulder
Esenduran, Gökçe	The Ohio State University
Esfahani, Peyman	Eidgenossische Technische Hochschule Zurich
Estep, Cassandra	Emory University
Esteves-Sorenson, Constanca	Yale University
Ethiraj, Sendil	London Business School
Ettredge, Michael	University of Kansas
Evans, James	University of Chicago
Evans, John	University of Pittsburgh
Evans, Richard	University of Virginia
Even-Tov, Omri	University of California, Berkeley
Evgeniou, Theodoros	INSEAD
Ewens, Michael	Carnegie Mellon University
Exley, Christine	Harvard University
Fabinger, Michal	University of Tokyo
Fairlie, Robert	University of California, Santa Cruz
Falch, Ranveig	Norges Handelshoyskole
Fan, Ming	University of Washington
Fan, Qintao	University of Oregon
Fan, Ying	University of Michigan
Fang, Christina	New York University
Fang, Lily	INSEAD
Fang, Vivian	University of Minnesota
Fang, Xiao	University of Delaware
Fang, Xin	Singapore Management University
Fanning, Jack	Brown University
Faravelli, Marco	University of Queensland
Farboodi, Mayram	Princeton University
Farias, Vivek	Massachusetts Institute of Technology
Farkas, Walter	University of Zurich
Farnsworth, Heber	Rice University
Faro, José Heleno	Federal University of Minas Gerais
Farre-Mensa, Joan	Harvard University
Farronato, Chiara	Harvard University
Fatas, Enrique	University of East Anglia
Faulkender, Michael	University of Maryland
Faurel, Lucile	Arizona State University
Fauver, Larry	University of Tennessee
Favero, Carlo	Bocconi University
Fay, Scott	Syracuse University
Fee, Edward	Tulane University
Fehr-Duda, Helga	ETH Zurich
Feiler, Daniel	Dartmouth College
Feit, Eleanor	Drexel University
Feldhutter, Peter	London Business School
Feldman, Emilie	University of Pennsylvania
Feldman, Jacob	Washington University
Feldman, Pnina	University of California, Berkeley
Fellner, Gerlinde	Ulm University
Feltovich, Nick	Monash University
Feng, Juan	City University of Hong Kong
Feng, Qi	Purdue University
Ferguson, John-Paul	Stanford University
Ferguson, Mark	University of South Carolina
Feri, Francesco	University of London
Ferman, Bruno	FGV
Fernando, Chitru	University of Oklahoma
Fernbach, Philip	University of Colorado
Ferraro, Domenico	Arizona State University
Ferreira, Daniel	London School of Economics
Ferreira, Kris	Harvard University
Ferreira, Pedro	Carnegie Mellon University
Ferri, Fabrizio	Columbia University
Filippin, Antonio	University of Milan
Fillmore, Ian	University of Chicago
Fink, Lior	Ben-Gurion University of the Negev
Fischbacher, Urs	University of Konstanz
Fischer, Marc	University of Cologne
Flammer, Caroline	Boston University
Fleckinger, Pierre	Paris School of Economics
Flores-Fillol, Ricardo	Rovira i Virgili University
Foley, Sean	University of Sydney
Foley-Fischer, Nathan	Federal Reserve Board
Fong, Duncan	Pennsylvania State University
Fong, Nathan	Temple University
Fonseca, Miguel	University of Exeter
Fons-Rosen, Christian	Pompeu Fabra University
Fontaine, Jean-Sébastien	Bank of Canada
Forbes, Silke	Case Western Reserve University
Fos, Vyacheslav	Boston College
Fosgerau, Mogens	Technical University of Denmark
Foster, Gigi	University of New South Wales
Foster, Kenneth	Dalhousie University
Fox, Jeremy	University of Michigan
Fracassi, Cesare	University of Texas at Austin
Franco, April	University of Toronto
Franco, Francesca	London Business School
Frank, Murray	University of Minnesota
Franzoni, Francesco	University of Lugano
Fraundorf, Scott	University of Pittsburgh
Freedman, Seth	Indiana University
French, Simon	University of Warwick
Frenkel, Sivan	Tel Aviv University
Fresard, Laurent	University of Maryland
Friedman, Henry	University of California, Los Angeles
Frydman, Cary	University of Southern California
Fu, Fangjian	Singapore Management University
Fu, Michael	University of Maryland
Fu, Qiang	National University of Singapore
Fuchs, William	University of California Berkeley
Fuchs-Schündeln, Nicola	Goethe University Frankfurt
Füllbrunn, Sascha	Radboud University Nijmegen
Funk, Patricia	Pompeu Fabra University
Funk, Russell	University of Minnesota
Furman, Jeff	Boston University
Fusari, Nicola	Johns Hopkins University
Gaddis, S. Michael	Pennsylvania State University
Galasso, Alberto	University of Toronto
Galenson, David	University of Chicago
Galeotti, Fabio	University of Lyon
Gallani, Susanna	Harvard University
Gallien, Jérémie	London Business School
Gallino, Santiago	Dartmouth College
Gallmeyer, Michael	University of Virginia
Gamache, Daniel	University of Georgia
Gan, Jie	Cheung Kong Graduate School of Business
Ganco, Martin	University of Wisconsin-Madison
Gande, Amar	Southern Methodist University
Ganduri, Rohan	Emory University
Ganglmair, Bernhard	University of Texas at Dallas
Ganguli, Ina	University of Massachusetts Amherst
Ganju, Kartik	McGill University
Gantchev, Nickolay	University of North Carolina at Chapel Hill
Ganuza, Juan-Jose	Pompeu Fabra University
Gao, Fei	University of Pennsylvania
Gao, George	Cornell University
Gao, Huasheng	Nanyang Technological University
Gao, Janet	Indiana University
Gao, Long	University of California, Riverside
Gao, Pengjie	University of Notre Dame
Gao, Pingyang	University of Chicago
Garcia, Diego	University of North Carolina at Chapel Hill
Garcia-Appendini, Emilia	University of St. Gallen
Gardete, Pedro	Stanford University
Garg, Rajiv	University of Texas at Austin
Garmaise, Mark	University of California, Los Angeles
Garrow, Laurie	Georgia Institute of Technology
Gartenberg, Claudine	New York University
Garthwaite, Craig	Northwestern University
Gatev, Evan	Simon Fraser University
Gayle, Philip	Kansas State University
Gayon, Jean-Philippe	Grenoble INP
Ge, Weili	University of Washington
Ge, Yong	The University of Arizona
Gee, Laura	Tufts University
Gelabert, Liliana	IE Business School
Geng, Xianjun	University of Texas at Dallas
Georgalos, Konstantinos	Lancaster University
Georgiadis, George	Boston University
Gerakos, Joseph	Dartmouth College
Gerken, William	University of Kentucky
Geylani, Tansev	University of Pittsburgh
Ghani, Tarek	Washington University in St Louis
Ghasemkhani, Hossein	Purdue University
Ghosh, Soumyadip	IBM
Giambona, Erasmo	University of Amsterdam
Giannetti, Mariassunta	Stockholm School of Economics
Giarratana, Marco	Bocconi University
Giesecke, Kay	Stanford University
Giglio, Stefano	University of Chicago
Gihleb, Rania	University of Pittsburgh
Gil, Ricard	Johns Hopkins University
Gilbride, Tim	University of Notre Dame
Gilje, Erik	University of Pennsylvania
Gill, David	Purdue University
Gine, Mireia	University of Pennsylvania
Ginglinger, Edith	Paris Dauphine University
Gino, Francesca	Harvard University
Girotra, Karan	INSEAD
Giroud, Xavier	Massachusetts Institute of Technology
Gittelman, Michelle	Rutgers University
Giulietti, Corrado	University of Southampton
Giustiziero, Gianluigi	University of Michigan
Givoly, Dan	Pennsylvania State University
Glasserman, Paul	Columbia University
Glode, Vincent	University of Pennsylvania
Glover, Brent	Carnegie Mellon University
Glover, Fred	University of Colorado
Gneezy, Ayelet	University of California, San Diego
Godart, Frederic	INSEAD
Godes, David	Harvard University
Godinho de Matos, Miguel	Catolica Lisbon School of Business and Economics
Godlonton, Susan	Williams College
Goel, Sharad	Stanford University
Goentzel, Jarrod	Massachusetts Institute of Technology
Goh, Jie Mein	Simon Fraser University
Goh, Joel	Harvard University
Gokpinar, Bilal	University College London
Goldberg, Amir	Stanford University
Goldberg, David	Georgia Tech
Goldfarb, Brent	University of Maryland
Goldman, Charles	E O Lawrence Berkeley National Laboratory
Goldman, Eitan	Indiana University
Goldman, Jim	University of Toronto
Goldsmith, Kelly	Northwestern University
Goldstein, Michael	Babson College
Golez, Benjamin	University of Notre Dame
Goncalo, Jack	Cornell University
Gong, Erick	Middlebury College
Gong, Jing	Temple University
Gong, Xiting	Chinese University of Hong Kong
Gonul, Sinan	Orta Dogu Teknik Universitesi
Gonzalez-Uribe, Juanita	London School of Economics
Goodwin, Geoffrey	University of Pennsylvania
Goodwin, Paul	University of Bath
Gopal, Anandasivam	University of Maryland
Gopalakrishnan, Arun	Washington University
Gopalan, Radhakrishnan	Washington University in St. Louis
Gopinath, Shyam	University of Utah
Gordon, Brett	Northwestern University
gordon, elizabeth	Temple University
Gordy, Michael	Federal Reserve Board
Gormley, Todd	Washington University in St. Louis
Gornall, Will	University of British Columbia
Gossner, Oliver	Paris School of Economics
Götz, Martin	Goethe University Frankfurt
Gourier, Elise	Princeton University
Gourio, Francois	Federal Reserve Bank of Chicago
Gow, Ian	Harvard University
Goyal, Amit	University of Lausanne
Goyal, Vidhan	Hong Kong University of Science and Technology
Goyal, Vineet	Columbia University
Goyenko, Ruslan	McGill University
Graeber, Thomas	University of Bonn
Grant, Simon	Australian National University Research School of Economics
Grassi, Basile	University of Oxford
Gray, Peter	University of Virginia
Green, Clifton	Emory University
Greenberg, Adam	University of California, San Diego
Greenleaf, Eric	New York University
Greenstein, Shane	Northwestern University
Greenwood, Brad	Temple University
Grennan, Matthew	University of Toronto
Griffin, Dale	University of British Columbia
Griffin, John	University of Texas at Austin
Grinstein, Amir	Ben-Gurion University
Gromb, Denis	HEC Paris
Gropp, Reint	Goethe University Frankfurt
Gross, Daniel	Harvard University
Grossman, Philip	Monash University
Grossman, Zachary	University of California, Santa Barbara
Grunewald, Andreas	University of Bonn
Gryglewicz, Sebastian	Erasmus University
Gu, Olivia Lifeng	University of Hong Kong
Gu, Zheyin (Jane)	University of Connecticut
Guadalupe, Maria	INSEAD
Guajardo, Jose	University of California Berkeley
Guarino, Antonio	University College London
Gubler, Timothy	Washington University in St. Louis
Guedhami, Omrane	University of South Carolina
Guest, Nick	Massachusetts Institute of Technology
Gui, Luyi	University of California, Irvine
Guidolin, Massimo	Bocconi University
Gulen, Huseyin	Purdue University
Gumus, Mehmet	McGill University
Guo, Hong	University of Notre Dame
Guo, Julian	Michigan State University
Guo, Pengfei	Hong Kong Polytechnic University
Guo, Vivian	Hong Kong Polytechnic University
Gupta, Nandini	Indiana University
Gupta, Varun	University of Chicago
Gupta, Vishal	University of Southern California
Gur, Yonatan	Stanford University
Gürtler, Oliver	University of Cologne
Guttman, Ilan	New York University
Hadlock, Charles	Michigan State University
Haggag, Kareem	University of Chicago
Hagiu, Andrei	Massachusetts Institute of Technology
Hah, Hyeyoung	Emory University
Hahl, Oliver	Carnegie Mellon University
Hakimov , Rustamdjan	WZB Berlin Social Science Center
Halaburda, Hanna	Harvard University
Hales, Jeffrey	Georgia Tech
Halevy, Yoram	University of British Columbia
Haliassos, Michael	Goethe University Frankfurt
Halling, Michael	Stockholm School of Economics and the Swedish House of Finance
Ham, Charles	University of Maryland
Ham, Sung	George Washington University
Hamilton, Barton	Washington University in St. Louis
Hamilton, Steve	California Polytechnic State University
Hamm, Sophia	The Ohio State University
Hamman, John	Florida State University
Han, Jungsuk	Stockholm School of Economics
Han, Kunsoo	McGill University
Han, Sang Pil	Arizona State University
Han, Yufeng	University of Colorado at Denver
Hanasusanto, Grani Adiwena	University of Texas at Austin
Hankins, Kristine	University of Kentucky
Hanley, Kathleen	Lehigh University
Hao, Lin	University of Notre Dame
Haran, Uriel	Ben-Gurion University of the Negev
Harbring, Christine	RWTH Aachen University
Hardisty, David	University of British Columbia
Harris, Jeffrey	American University
Harris, Rachel	University of Toronto
Harris, Trevor	Columbia University
Harrison, Glenn	Georgia State University
Harsha, Pavithra	Massachusetts Institute of Technology
Hart, Oliver	Harvard University
Hartman-Glaser, Barney	University of California, Los Angeles
Hartmann, Wesley	Stanford University
Hartzmark, Samuel	University of Southern California
Haruvy, Ernan	University of Texas at Dallas
Hasan, Sharique	Stanford University
Haselhuhn, Michael	University of California, Riverside
Hasija, Sameer	INSEAD
Haskel, Jonathan	Imperial College London
Hassin, Refael	Tel Aviv University
Haugh, Martin	Columbia University
Hausken, Kjell	University of Stavanger
Hauswald, Robert	American University
Haviv, Avery	University of Toronto
Hawk, Ashton	The Ohio State University
Hawn, Olga	University of North Carolina at Chapel Hill
Haws, Kelly	Vanderbilt University
He, Chuan	University of Colorado at Boulder
He, Jie	University of Georgia
He, Long	National University of Singapore
He, Ying	University of Southern Denmark
Heese, Jonas	Harvard University
Heffetz, Ori	Cornell University
Hegde, Deepak	New York University
Heidergott, Bernd	VU University
Heimer, Rawley	Federal Reserve - Cleveland
Heimeriks, Koen	Tilburg University
Heinkel, Robert	University of British Columbia
Heinle, Mirko	University of Pennsylvania
Heinz, Matthias	Goethe-University
Heinzel, Christoph	Institut National de la Recherche Agronomique
Hellmann, Thomas	University of Oxford
Helm, Jonathan	Indiana University
Henderson, Vicky	University of Warwick
Henkel, Joachim	Technical University of Munich
Henry, Elaine	Stevens Institute of Technology
Henry, Emeric	Sciences Po
Henry, Tyler	Miami University
Hernandez, Exequiel	University of Pennsylvania
Hertzberg, Andrew	Columbia University
Hertzel, Michael	Arizona State University
Hervas-Drane, Andres	University College London
Herz, Holger	University of Fribourg
Herzog, Stefan	Max Planck Institute for Human Development
Heston, Steven	University of Maryland
Heyerdahl-Larsen, Christian	London Business School
Hiatt, Shon	Cornell University
Higgins, Matt	Georgia Institute of Technology
Hillegeist, Stephen	Arizona State University
Hilscher, Jens	University of California, Davis
Hinnosaar, Toomas	Collegio Carlo Alberto
Hlynka, Myron	University of Windsor
Ho, Yi-Chun	George Washington University
Ho, Yi-Jen (Ian)	Pennsylvania State University
Hoban, Paul	University of Wisconsin-Madison
Hoberg, Gerard	University of Southern California
Hobson, David	University of Warwick
Hochberg, Yael	Rice University
Hodrick, Robert	Columbia University
Hoeffler, Steve	Vanderbilt University
Hoekstra, Mark	Texas A&M University
Hoffman, Mitchell	University of Toronto
Hoisl, Karin	University of Munich
Hoisl, Larin	University of Mannheim
Holm, Hakan	Lund University
Holzhacker, Martin	Michigan State University
Hom, Peter	Arizona State University
Homonoff, Tatiana	Cornell University
Hong, Kevin	Arizona State University
Honhon, Dorothee	University of Texas at Dallas
Honka, Elisabeth	University of Texas at Dallas
Honore, Florence	Iowa State University
Hope, Ole-Kristian	University of Toronto
Hopfensitz, Astrid	Toulouse School of Economics
Hora, Manpreet	Georgia Institute of Technology
Hornstein, Abigail	Wesleyan University
Horton, Joanne	Exeter University
Horton, John	New York University
Hoskisson, Robert	Rice University
Hossain, Tanjim	University of Toronto
Hotchkiss, Edith	Boston College
Hou, Kewei	The Ohio State University
Hovakimian, Gayane	Fordham University
Howell, Sabrina	New York University
Hrdlicka, Christopher	University of Washington
Hribar, Paul	University of Iowa
Hsu, Alex	Georgia Institute of Technology
Hsu, Po-Hsuan	University of Hong Kong
Hu, Bin	University of North Carolina
Hu, Grace	University of Hong Kong
Hu, Jian	University of Michigan - Dearborn
Hu, Ming	University of Toronto
Hu, Ye	University of Houston
Hu, Zhenyu	National University of Singapore
Huang, Chong	University of California, Irvine
Huang, Darien	Cornell University
Huang, Dashan	Singapore Management University
Huang, Guofang	Carnegie Mellon University
Huang, Henry	Yeshiva University
Huang, Jennifer	Cheung Kong Graduate School of Business
Huang, Jiekun	University of Illinois at Urbana-Champaign
Huang, Jing-zhi	Pennsylvania State University
Huang, Jun	University of Leuven
Huang, Kelly	Florida International University
Huang, Kenneth	National University of Singapore
Huang, Ke-Wei	National University of Singapore
Huang, Laura	University of Pennsylvania
Huang, Lixin	Georgia State University
Huang, Peng	University of Maryland
Huang, Simon	Southern Methodist University
Huang, Sterling	Singapore Management University
Huang, Tingliang	Boston College
Huang, Xiao	Concordia University
Huang, Xing	Michigan State University
Huang, Yan	University of Michigan
Huck, Steffan	WZB Berlin Social Science Center
Huckman, Robert	Harvard University
Huddart, Steven	Pennsylvania State University
Huesmann, Katharina	University of Cologne
Huffman, Matthew	University of California, Irvine
Hui, Sam	New York University
Humphrey-Jenner, Mark	UNSW Business School
Hung, Mingyi	Hong Kong University of Science and Technology
Hurd, Tom	McMaster University
Hurkens, Sjaak	Institute for Economic Analysis
Huse, Morten	Handelshoyskolen BI
Huson, Mark	University of Alberta
Hutchison-Krupat, Jeremy	University of Virginia
Hutton, David	University of Michigan
Hvidkjaer, Soeren	Copenhagen Business School
Hwang, Byoung-Hyoun	Cornell University
Hwang, Elina	University of Washington
Hydari, Muhammad	Carnegie Mellon University
Hyndman, Kyle	University of Texas at Dallas
Iancu, Dan	Stanford University
Ibanez, Maria	Harvard University
Ibrahim, Rouba	University College London
Igan , Deniz	International Monetary Fund
Illeditsch, Philipp	University of Pennsylvania
Ilut, Cosmin	Duke University
Imai, Kosuke	Princeton University
Imas, Alex	Carnegie Mellon University
Inbar, Yoel	University of Toronto
Ingolfsson, Armann	University of Alberta
Ioannou, Ioannis	London Business School
Ion, Mihai	University of Arizona
Ippolito, Filippo	Pompeu Fabra University
Irani, Rustom	University of Illinois
Iravani, Foad	University of Washington
Iriberri, Nagore	Pompeu Fabra University
Irlenbusch, Bernd	University of Cologne
Irmak, Caglar	University of South Carolina
Irvine, Paul	Texas Christian University
Ishihara, Akifumi	Seisaku Kenkyu Daigakuin Daigaku
Ishihara, Masakazu	New York University
Islegen, Ozge	Northwestern University
Israelsen, Ryan Dwight	Indiana University
Ivanov, Vladimir	U.S. Securities and Exchange Commission
Iverson, Benjamin	Northwestern University
Ivkovich, Zoran	Michigan State University
Iyengar, Raghuram	University of Pennsylvania
Iyer, Krishnamurthy	Cornell University
Iyer, Rajkamal	Massachusetts Institute of Technology
Jabali, Ola	Ecole des Hautes Etudes Commerciales
Jabr, Wael	Georgia State University
Jackson, Peter	Cornell University
Jackwerth, Jens	University of Konstanz
Jacobs, Kris	McGill University
Jacobsen, Mark	University of California, San Diego
Jacobsen, Stacey	Southern Methodist University
Jacquillat, Alexandre	Carnegie Mellon University
Jagabathula, Srikanth	New York University
Jagannathan, Ravi	Northwestern University
Jagolinzer, Alan	University of Colorado at Boulder
Jain, Aditya	Baruch College
Jain, Anil	Federal Reserve Board
Jain, Nitish	INSEAD
Jain, Pankaj	University of Memphis
Jamal, Karim	University of Alberta
Jame, Russell	University of Kentucky
Janakiraman, Ganesh	University of Texas at Dallas
Jang, Yeejin	Purdue University
Jasin, Stefanus	University of Michigan
Jayaraman, Sudarshan	University of Rochester
Jenkins, Nicole	University of Kentucky
Jensen, Michael	University of Michigan
Jenter, Dirk	Stanford University
Jeppesen, Lars	Bocconi University
Jerath, Kinshuk	Columbia University
Jeziorski, Przemyslaw	University of California, Berkeley
Jian, Lian	University of Southern California
Jiang, Baojun	Washington University in St. Louis
Jiang, Danling	Florida State University
Jiang, George	University of Arizona
Jiang, Hao	Michigan State University
Jiang, Jack	National University of Singapore
Jiang, John	Michigan State University
Jiang, Li	Hong Kong Polytechnic University
Jiang, Ruiwei	University of Michigan
Jiang, Wei	Columbia University
Jiang, Xiaoming	McGill University
Jiang, Zhengrui	Iowa State University
Jimenez, Natalia	University of Granada
Jin, Fujie	Indiana University Bloomington
Jin, Ginger	University of Maryland, College Park
Jin, Lawrence	Yale University
Jindal, Pranav	University of North Carolina
Jindapon, Paan	University of Alabama
Jing, Bing	Cheung Kong Graduate School of Business
Jochem, Torsten	University of Amsterdam
Johannes, Michael	Columbia University
Johar, Monica	University of North Carolina at Charlotte
John, Leslie	Harvard University
Johnson, Dan	Colorado College
Johnson, Eric	Columbia University
Johnson, Garrett	University of Rochester
Johnson, Justin	Cornell University
Johnson, Steven	University of Virginia
Johnson, Timothy	University of Illinois at Urbana-Champaign
Jonasson, Jonas	Massachusetts Institute of Technology
Jorgensen, Bjorn	London School of Economics
Jose, Victor	Georgetown University
Joseph, John	Duke University
Joseph, Kissan	University of Kansas
Joshi, Aparna	Pennsylvania State University
Joshi, Yogesh	University of Maryland
Joslin, Scott	University of Southern California
Jostova, Gergana	George Washington University
Jotikasthira, Pab	Southern Methodist University
Jouini, Elyès	University Paris-Dauphine
Jouini, Oualid	Ecole Centrale Paris
Juergens, Jennifer	Drexel University
Julio, Brandon	University of Oregon
Juneja, Sandeep	Tata Institute of Fundamental Research
Jung, Michael	New York University
Jung, Minah	University of California, Berkeley
Kabra, Ashish	INSEAD
Kachelmeier, Steve	University of Texas at Austin
Kacperczyk, Aleksandra	Massachusetts Institute of Technology
Kacperczyk, Marcin	Imperial College London
Kadlec, Gregory	Virginia Tech
Kadyrzhanova, Dalida	University of Maryland
Kahraman, Bige	University of Oxford
Kaibel, Volker	Otto-von-Guericke-Universitat Magdeburg Medizinische Fakultat
Kaiser, Ulrich	University of Zurich
Kaivanto, Kim	Lancaster University
Kajackaite, Agne	University of Cologne
Kalcheva, Ivalina	University of California, Riverside
Kalcsics, Joerg	University of Edinburgh
Kale, Jayant	Northeastern University
Kalimipalli, Madhu	Wilfrid Laurier University
Kalkanci, Basak	Georgia Institute of Technology
Kalnins, Arturs	Cornell University
Kalra, Ajay	Rice University
Kamara, Avraham	University of Washington
Kaniel, Ron	University of Rochester
Kannan, P.	University of Maryland
Kanoria, Yash	Columbia University
Kanz, Martin	World Bank
Kapadia, Nishad	Tulane University
Kaparis, Konstantinos	University of Macedonia
Kaplan, Zack	Washington University in St. Louis
Kapoor, Rahul	University of Pennsylvania
Karaesmen, Fikri	Koc University
Karagozoglu, Emin	Bilkent University
Karakas, Oguzhan	Boston College
Kartal, Melis	Vienna University of Economics and Business
Kartasheva, Anastasia	Bank for International Settlements
Kasa, Kenneth	Simon Fraser University
Katok, Elena	University of Texas at Dallas
Katona, Zsolt	University of California, Berkeley
Kaufman, David	University of Michigan - Dearborn
Kaul, Aditya	University of Alberta
Kaul, Aseem	University of Minnesota
Kaur, Supreet	Columbia University
Kaya, Murat	Sabanci University
Kazemian, Pooyan	University of Michigan
KC, Diwas	Emory University
Ke, T. Tony	Massachusetts Institute of Technology
Kedia, Simi	Rutgers University
Keil, Thomas	Aalto University
Keller, JR	Cornell University
Kelley, Eric	University of Arizona
Kelly, Bryan	University of Chicago
Kelly, Khim	University of Central Florida
Kelly, Peter	University of Notre Dame
Kelly, Theresa	Washington University in St. Louis
Keloharju, Matti	Aalto University
Kelsey, David	University of Exeter
Kemahlioglu-Ziya, Eda	North Carolina State University
Kemel, Emmanuel	University of Paris I
Kerr, William	Harvard University
Kesavan, Saravanan	University of North Carolina at Chapel Hill
Keskin, N. Bora	Duke University
Kessler, Judd	University of Pennsylvania
Kettunen, Janne	George Washington University
Keys, Benjamin	University of Chicago
Khalil, Fahad	University of Washington
Khan, Mozaffar	University of Minnesota
Khan, Urooj	Columbia University
Khanjari, Neda	Rutgers University
Khanna, Naveen	Michigan State University
Kher, Romi	Baruch College
Khwaja, Ahmed	Yale University
Kiku, Dana	University of Illinois at Urbana-Champaign
Kilian, Lutz	University of Michigan
Kilinc-Karzan, Fatma	Carnegie Mellon University
Kim, Antino	Indiana University Bloomington
Kim, Chang Soo	Yonsei University
Kim, Hyunseob	Cornell University
Kim, Jeong-Bon	University of Waterloo
Kim, Jerry	Columbia University
Kim, Jinhwan	Massachusetts Institute of Technology
Kim, Jin-Mo	Rutgers University
Kim, Jun	Hong Kong University of Science and Technology
Kim, Kyu	University of Southern California
Kim, Sang-Hyun	Yale University
Kim, Sharon	Johns Hopkins University
Kim, Song-Hee	University of Southern California
Kim, Soohun	Georgia Tech
Kim, Sung	University of Wisconsin-Madison
Kim, Taehyun	University of Notre Dame
Kim, Tongil "TI"	Emory University
Kim, Woojin	Seoul National University
Kim, Yongsuk	Hong Kong University of Science and Technology
King, Andrew	Dartmouth College
King, Tao-Hsien	University of North Carolina at Charlotte
Kirchler, Michael	University of Innsbruck
Kisin, Roni	University of Pennsylvania
Kittsteiner, Thomas	RWTH Aachen University
Klapper, Daniel	Institute of Marketing
Klassen, Robert	University of Western Ontario
Klayman, Joshua	University of Chicago
Kleinbaum, Adam	Dartmouth College
Knechel, Robert	University of Florida
Knight, Andrew	Washington University in St. Louis
Knijnenburg, Bart	Clemson University
Knott, Anne Marie	Washington University in St. Louis
Koch, Alexander	Aarhus University
Koch, Andrew	University of Pittsburgh
Kochan, Tom	Massachusetts Institute of Technology
Kocher, Martin	University of Munich
Kockesen, Levent	Koc University
Koehler, Derek	University of Waterloo
Koellinger, Philipp D.	VU University
Koenig-Kersting, Christian	Heidelberg University
Koenigsberg, Oded	London Business School
Kogan, Shimon	Carnegie Mellon University
Koh, Byungwan	University of Calgary
Koh, Kevin	Nanyang Technological University
Koh, Tat Koon	Hong Kong University of Science and Technology
Koharki, Kevin	Washington University in St. Louis
Kokkodis, Marios	Boston College
Koksalan, Murat	Middle East Technical University
Kolasinski, Adam	Texas A&M University
Kolay, Sreya	University of California, Irvine
Kölle, Felix	University of Nottingham
Kominers, Scott	Harvard University
Kong, Guangwen	University of Minnesota
Kong, Tony	University of Houston
Koning, Rembrand	Stanford University
Kopel, Michael	University of Graz
Kops, Christopher	Goethe University Frankfurt
Kornish, Laura	University of Colorado at Boulder
Körpeoğlu, Ersin	University College London
Kosova, Renata	Imperial College London
Kosowski, Robert	Imperial College London
Kostami, Vasiliki	London Business School
Kostovetsky, Leonard	Boston College
Kou, Steven	National Univeristy of Singapore
Kovacs, Balazs	Yale University
Kovner, Anna	Federal Reserve Bank of New York
Kozhevnikov, Maria	Harvard Medical School
Kraft, Pepa	New York University
Kraft, Tim	University of Virginia
Krasnova, Hanna	University of Bern
Krawczyk, Michal	University of Warsaw
Kremer, Mirko	Frankfurt School of Finance & Management
Krepely Pool, Veronika	Indiana University
Kretschmer, Tobias	University of Munich
Krishnan, Harish	University of British Columbia
Krishnan, Karthik	Northeastern University
Krishnan, Ranjani	Michigan State University
Krishnan, Trichy	National University of Singapore
Kristof-Brown, Amy	University of Iowa
Kroll, Stephan	Colorado State University
Kruger, Sam	University of Texas at Austin
Krupka, Erin	University of Michigan
Kruttli, Mathias	Federal Reserve Board of Governors
Kube, Sebastian	University of Bonn
Kübler, Dorothea	WZB Berlin Social Science Center
Kucukyavuz, Simge	University of Washington
Kuehn, Lars-Alexander	Carnegie Mellon University
Kuhn, Michael	University of Oregon
Kuhn, Peter	University of California, Santa Barbara
Kuhnen, Camelia	University of North Carolina at Chapel Hill
Kulchina, Elena	Duke University
Kull, Thomas	Arizona State University
Kulp, Susan	Harvard University
Kumar, Anuj	University of Florida
Kumar, Vineet	Yale University
Kumer, Michael	Georgia Institute of Technology
Kundisch, Dennis	University of Paderborn
Kunnumkal, Sumit	Indian School of Business
Kuo, Chia-Wei	National Taiwan University
Kupor, Daniella	Boston University
Kuppuswamy, Venkat	University of North Carolina at Chapel Hill
Kurtulus, Mumin	Vanderbilt University
Kurtzman, Robert	Federal Reserve Board
Kuruzovich, Jason	Rensselaer Polytechnic Institute
Kusterer, David	University of Cologne
Kvaloy, Ola	University of Stavanger
Kwark, Young	University of Florida
Kwon, H. Dharma	University of Illinois at Urbana-Champaign
Kwon, Juhee	City University of Hong Kong
Kyle, Margaret	MINES ParisTech
Labro, Eva	University of North Carolina at Chapel Hill
Lacetera, Nicola	University of Toronto
Laczo, Sarolta	University of Surrey
Lahiri, Atanu	University of Texas at Dallas
Lai, Guoming	University of Texas at Austin
Lakhani, Karim	Harvard University
Lam, Henry	Boston University
Lambrecht, Anja	London Business School
Lambrecht, Bart	University of Cambridge
Lampe, Ryan	California State University
Landis, Blaine	University College London
Lando, David	Copenhagen Business School
Landry, Peter	University of Toronto
Landsman, Vardit	Tel Aviv University
Langer, Nishtha	Rensselaer Polytechnic Institute
Langer, Thomas	University of Muenster
Larocque, Stephannie	University of Notre Dame
Larsen, Brad	Stanford University
Larson, Chad	Olin Business School
Laudenbach, Christine	Goethe University Frankfurt
Lauer, Thomas	University of Cologne
Lauga, Dominique	University of Cambridge
Laursen, Keld	Copenhagen Business School
Laux, Volker	University of Texas at Austin
Lavieri, Mariel	University of Michigan
Law, Kelvin	Tilburg University
Lawarree, Jacques	University of Washington
Lawrence, Alastair	University of California, Berkeley
Lazarev, John	New York University
Lazzarini, Sergio	Insper Institute of Education and Research
Le Mens, Gael	Pompeu Fabra University
Le, Anh	Pennsylvania State University
Leahey, Erin	University of Arizona
Leary, Mark	Washington University in St. Louis
Lecuona, Ramon	Duke University
L'Ecuyer, Pierre	University of Montreal
Lederman, Mara	University of Toronto
Lee, Clarence	Harvard University
Lee, Deishin	Boston College
Lee, Dokyun	Carnegie Mellon University
Lee, Donald	Yale University
Lee, Gene Moo	University of Texas at Arlington
Lee, honggi	Duke University
Lee, Hsiao-Hui	University of Hong Kong
Lee, Jeho	Seoul National University College of Business Administration
Lee, Jiyoon	George Washington University
Lee, Kuan-Hui	Seoul National University
Lee, Mina	Washington University in St. Louis
Lee, Seokwoo	George Mason University
Lee, Suzanne	Georgia Institute of Technology
Lee, Thomas	University of California Berkeley
Lee, Yun Shin	University of Cambridge
Lefgren, Lars	Brigham Young University
Leibbrandt, Andreas	Monash University
Leider, Stephen	University of Michigan
Leitner, Yaron	Federal Reserve Bank of Philadelphia
Lejeune, Miguel	George Washington University
Lempert, Robert	RAND Corporation
Lennox, Clive	University of Southern California
Leonard, Kenneth	University of Maryland
Leonardelli, Geoffrey	University of Toronto
Lerman, Alina	Yale University
Lescourret , Laurence	ESSEC Business School
Leshno, Jacob	Columbia University
Leshno, Moshe	Tel-Aviv University
Lesmond, David	Tulane University
Lester, Rebecca	Stanford University
Leung, Ho-fung	Chinese University of Hong Kong
Leung, Ming	University of California, Berkeley
Levi, Retsef	Massachusetts Institute of Technology
Levine, David	Washington University in St. Louis
Levit, Doron	University of Pennsylvania
Levy, Haim	The Hebrew University of Jerusalem
Lewellen, Jonathan	Dartmouth College
Lewellen, Katharina	Dartmouth College
lewellen, Stefan	London Business School
Lewis, Demetrius	Emory University
Lewis, Kevin	University of California, San Diego
l'Haridon, Olivier	University of Rennes 1
Li, Alice	Indiana University Bloomington
Li, Beibei	New York University
Li, Chenxu	Peking University
Li, Cuihong	University of Connecticut
Li, Danielle	Harvard University
Li, Dongmei	University of South Carolina
Li, Guang	University of Southern California
Li, Hongmin	Arizona State University
Li, Jia	Purdue University
li, Jing	Singapore Management University
Li, Jonathan	University of Ottawa
Li, Jun	University of Michigan
Li, Jun	University of Texas at Dallas
Li, Kevin	University of California, Riverside
Li, Lei	University of Kansas
Li, Meng	University of Illinois at Urbana-Champaign
Li, Ningzhong	University of Texas at Dallas
Li, Ping	Rutgers University
Li, Shaojin	Shanghai University of Finance and Economics
Li, Sherry	University of Texas at Dallas
Li, Shibo	Indiana University
Li, Si	Wilfrid Laurier University
Li, Sophia	Michigan State University
Li, Tao	City University of Hong Kong
Li, Tao	Santa Clara University
Li, Tao	University of Warwick
Li, Xi	Temple University
Li, Xi	University of Toronto
Li, Xiao-Bai	University of Massachusetts Lowell
Li, Xiaolin	University of Texas at Dallas
Li, Xitong	HEC Paris
Li, Yang	Cheung Kong Graduate School of Business
Li, Yang	Chinese University of Hong Kong
Li, Ye	University of California, Riverside
Li, Yuanhao	Norwegian School of Economics
Li, Zhi	The Ohio State University
Li, Zhuoxin	Boston College
Lian, Lei	University of Massachusetts Amherst
Liang, Bing	University of Massachusetts
Liang, Pierre Jinghong	Carnegie Mellon University
Liao, Scott	University of Toronto
Libai, Barak	IDC Herzliya
Libby, Theresa	University of Waterloo
Liberman, Andres	New York University
Liberti, Jose	DePaul University
Lim, Michael	University of Illinois Urbana-Champaign
Lim, Noah	University of Wisconsin-Madison
Lim, Sonya	DePaul University
Lim, W. S.	National University of Singapore
Lim, Yun Fong	Singapore Management University
Lin, Chen	University of Hong Kong
Lin, Haijin	University of Houston
Lin, Jianjing	Tulane University
Lin, Mingfeng	University of Arizona
Lin, Shu	California State University
Lin, Song	Hong Kong University of Science and Technology
Lin, Winston	The State University of New York at Buffalo
Linardi, Sera	University of Pittsburgh
Linderman, Kevin	University of Minnesota
Lindner, Florian	University of Innsbruck
Lipscomb, Molly	University of Virginia
Litov, Lubomir	University of Oklahoma
Liu, Baixiao	Florida State University
Liu, Chengwei	University of Warwick
Liu, Chris	University of Toronto
Liu, Chunlin	UNR
Liu, De	University of Minnesota Twin Cities
Liu, Dengpan	Iowa State University
Liu, Hong	Washington University in St. Louis
Liu, Hongju	University of Connecticut
Liu, Ka-Yuet	University of California, Los Angeles
Liu, Laura	Peking University
Liu, Liqun	Texas A&M University
Liu, Nan	Columbia University
Liu, Qian	Hong Kong University of Science and Technology
Liu, Qiang	Purdue University
Liu, Tieming	Oklahoma State University
Liu, Tingting	University of Georgia
Liu, Tracy	Tsinghua University
Liu, Yan	Texas A&M University
Liu, Yunan	North Carolina State University
Liu, Yunchuan	University of Illinois at Urbana-Champaign
Liu, Zhixin	University of Michigan - Dearborn
Lizyayev, Andrey	Erasmus University
Llanes, Gaston	Pontificia Universidad Católica de Chile
Lobel, Ilan	New York University
Lobel, Ruben	University of Pennsylvania
Lochstoer, Lars	Columbia University
Loewenstein, George	Carnegie Mellon University
Loewenstein, Mark	University of Maryland
Loh, Roger	Singapore Management University
Loomes, Graham	University of Warwick
Lopomo, Giuseppe	Duke University
Loualiche, Erik	Massachusetts Institute of Technology
Loughran, Tim	University of Notre Dame
Louis, Henock	Pennsylvania State University
Lovett, Mitch	University of Rochester
Low, Angie	Nanyang Technological University
Lowery, J.	University of Texas at Austin
Lowry, Michelle	Drexel University
Lu, Guangli	University of British Columbia
Lu, Lauren	University of North Carolina at Chapel Hill
Lu, Shijie	University of North Carolina at Chapel Hill
Lu, Susan	Purdue University
Lu, Tong	University of Houston
Lu, Xin	Cornell University
Lu, Yan	University of Florida
Lu, Yingda	Rensselaer Polytechnic Institute
Lu, Yixin	George Washington University
Lu, Zhongjin	University of Georgia
Lubin, Benjamin	Boston University
Luca, Michael	Harvard University
Lucas, Brian	University of Chicago
Luebbecke, Marco	RWTH Aachen University
Lueck, Sonja	University of Paderborn
Luedtke, James	University of Wisconsin-Madison
Lunawat, Radhika	University of California, Irvine
Lundblad, Christian	University of North Carolina at Chapel Hill
Lungeanu, Razvan	Pennsylvania State University
Luo, Hong	Harvard University
Luo, Jiao	University of Minnesota
Luo, Lan	University of Southern California
Luo, Wei	IESE Business School
Luo, Xingguo	Zhejiang University
Lyandres, Evgeny	Boston University
Lynham, John	University of Hawaii
Lyons, Liz	University of California, San Diego
Ma, Dan	Singapore Management University
Ma, Linlin	Northeastern University
Ma, Liye	University of Maryland
Ma, Xiao	University of Arkansas
Macchiavello, Rocco	University of Warwick
MacCormack, Alan	Harvard University
MacCrory, Frank	Fordham University
Macher, Jeffrey	Georgetown University
Maciejovsky, Boris	University of California, Riverside
Macis, Mario	Johns Hopkins University
Maddah, Bacel	American University of Beirut
Magazine, Michael	University of Cincinnati
Magee, Joe	New York University
Magnani, Jacopo	Purdue University
Mahenc, Philippe	Laboratoire Montpellierain d\'Economie Theorique et Appliquee
Mahlendorf, Matthias	Frankfurt School of Finance & Management
Mahmood, Ishtiaq	National University of Singapore
Mahmoudi, Hamed	University of Oklahoma
Maillart, Lisa	University of Pittsburgh
Maio, Paulo	Hanken School of Economics
Mak, Henry	Indiana University - Purdue University Indianapolis
Mak, Ho-Yin	Hong Kong University of Science and Technology
Mak, Vincent	University of Cambridge
Makridis, Christos	Stanford University
Malenko, Nadya	Boston College
Malinova, Katya	University of Toronto
Malkoc, Selin	The Ohio State University
Malter, Daniel	Harvard University
Mamani, Hamed	University of Washington
Mamer, John	University of California, Los Angeles
Mancini, Loriano	École Polytechnique Fédérale de Lausanne
Manconi, Alberto	Tilburg University
Manela, Asaf	Washington University in St. Louis
Mani, Vidya	Pennsylvania State University
Mankart, Jochen	Deutsche Bundesbank
Manshadi, Vahideh	Massachusetts Institute of Technology
Manso, Gustavo	University of California, Berkeley
Mantena, Ravindra	University of Rochester
Marcellino, Massimiliano	Bocconi University
Marcotte, Patrice	University of Montreal
Marechal, Michel Andre	University of Zurich
Marinesi, Simone	University of Pennsylvania
Marinovic, Ivan	Stanford University
Markarian, Garen	WHU Koblenz
Markle, Alex	Fordham University
Markov, Stanimir	Southern Methodist University
Martignoni, Dirk	University of Lugano
Martin Utrera, Alberto	Lancaster University
Martin, Xiumin	Washington University in St Louis
Martinelli, Arianna	Scuola Superiore Sant'Anna Laboratorio di Economia e Management
Martinez, Jose	University of Connecticut
Martinez, Octavio	INCAE Business School
Martínez-de-Albéniz, Victor	IESE Business School
Marx, Matt	Massachusetts Institute of Technology
Masclet, David	University of Rennes 1
Mashruwala, Raj	University of Calgary
Massa, Massimo	INSEAD
Massacci, Daniele	Einaudi Institute for Economics and Finance
Masulis, Ronald	The University of New South Wales
Matejka, Michal	Arizona State University
Mathews, Richmond	University of Maryland
Matisoff, Daniel	Georgia Tech
Matos, Pedro	University of Virginia
Matray, Adrien	Princeton University
Matsumoto, Dawn	University of Washington
Maturana, Gonzalo	Emory University
Mauer, David	University of North Carolina at Charlotte
Maug, Ernst	University of Mannheim
Maurer, Thomas	Washington University
Maxwell, John	Indiana University
Mayer, Kyle	University of Southern California
Mayew, Bill	Duke University
Mayock, Tom	Office of the Comptroller of the Currency
Mayzlin, Dina	Yale University
McCausland, William	University of Montreal
McConnell, John	Purdue University
McDermott, Katie	Georgetown University
McDevitt, Ryan	University of Rochester
McElheran, Kristina	University of Toronto
McEvily, Bill	University of Toronto
McGrath, Patia	University of North Carolina at Chapel Hill
McInnis, John	University of Texas at Austin
McIntosh, Craig	University of California, San Diego
McKenzie, Craig	University of California, San Diego
McKenzie, David	World Bank
McLean, David	Georgetown University
McManus, Brian	University of North Carolina at Chapel Hill
McQuade, Tim	Stanford University
McShane, Blakeley	Northwestern University
McVay, Sarah	University of Washington
Meer, Jonathan	Texas A&M University
Mehra, Ajay	University of Kentucky
Mehra, Amit	University of Texas at Dallas
Mehrotra, Mili	University of Minnesota
Mehta, Nitin	University of Toronto
Mejia, Jorge	Indiana University
Melenberg, Bertrand	Tilburg University
Melendez Jimenez, Miguel	University of Malaga
Melessa, Samuel	University of Iowa
Melzer, Brian	Northwestern University
Mendoza-Arriaga, Rafael	University of Texas at Austin
Menegatti, Mario	University of Parma
Meng, Xiaojing	New York University
Mengel, Friederike	University of Essex and Maastricht University
Menietti, Michael	Harvard University
Menkveld, Albert	VU University
Menon, Anoop	University of Pennsylvania
Menon, Nirup	George Mason University
Mergenthaler, Richard	University of Iowa
Merkle, Edgar	University of Missouri
Merluzzi, Jennifer	Tulane University
Merrick, Jason	Virginia Commonwealth University
Mersereau, Adam	University of North Carolina at Chapel Hill
Meunier, Guy	INRA
Meyer, Steffen	Leibniz Universität Hannover
Mezzetti, Claudio	The University of Queensland
Miao, Jianjun	Boston University
Michael, Steven	University of Illinois
Michaeli, Beatrice	University of California, Los Angeles
Michaely, Roni	Cornell University
Michels, Jeremy	University of Pennsylvania
Michenaud, Sebastien	DePaul University
Mick, David	University of Virginia
Mierendorff, Konrad	University of Zürich
Miettinen, Topi	Hanken School of Economics
Mihm, Jurgen	INSEAD
Mihov, Vassil	Texas Christian University
Mikhed, Slava	Federal Reserve Bank of Philadelphia
Miklós-Thal, Jeanine	University of Rochester
Milbradt, Konstantin	Northwestern University
Milinski, Manfred	Max Planck Institute for Evolutionary Biology
Miller, Amalia	University of Virginia
Miller, Brian	Indiana University
Mills, Alex	Indiana University
Mills, Lillian	University of Texas at Austin
Milner, Joseph	University of Toronto
Minca, Andreea	Cornell University
Minichilli, Alessandro	Bocconi University
Minnis, Michael	University of Chicago
Minor, Dylan	Northwestern University
Minson, Julia	Harvard University
Minutti-Meza, Miguel	University of Miami
Miquel-Florensa, Josepa	Toulouse School of Economics
Miric, Milan	University of Southern California
Miscione, Gianluca	University College Dublin
Mishra, Abhay	Georgia State University
Mišić, Velibor	Massachusetts Institute of Technology
Misra, Kanishka	London Business School
Mitchell, John	RPI
Mitchell, Matthew	University of Toronto
Mittendorf, Brian	The Ohio State University
Mitton, Todd	Brigham Young University
Mizik, Natalie	University of Washington
Moallemi, Ciamac	Columbia University
Mobbs, Shawn	University of Alabama
Mochon, Daniel	Tulane University
Modaresi, Sajad	Duke University
Moers, Frank	Maastricht University School
Mohan, Bhavya	Harvard University
Mohanram, Partha	University of Toronto
Mohlin, Erik	Oxford University
Mollerstrom, Johanna	George Mason University
Mollick, Ethan	University of Pennsylvania
Monahan, Steven	INSEAD
Mondria, Jordi	University of North Carolina at Chapel Hill
Monin, Benoit	Stanford University
Montgomery, Alan	Carnegie Mellon University
Montoya, Estrella	Utrecht University
Montoya, Ricardo	Columbia University
Moon, Ken	University of Pennsylvania
Moore, Don	University of California, Berkeley
Mora, Nada	Federal Reserve Bank of Kansas
Moran, Pablo	University of Calgary
Morck, Randall	University of Alberta
Moreira, Alan	Yale University
Moreno-Garcia, Antonio	Northwestern University
Morewedge, Carey	Boston University
Moritz, Brent	Pennsylvania State University
Morjaria, Ameet	Northwestern University
Morrison, Edward	Columbia University
Mors, Louise	Copenhagen Business School
Morse, Adair	University of California, Berkeley
Moser, Donald	University of Pittsburgh
Mostagir, Mohamed	University of Michigan
Moulton, Pamela	Cornell University
Mu, Liying	University of Delaware
Muchnik, Lev	New York University
Mueller, Maximilian	WHU
Muermann, Alexander	Vienna University of Economics and Business
Mukherjee, Abhiroop	Hong Kong University of Science and Technology
Müller-Trede, Johannes	University of California, San Diego
Mullins, William	University of Maryland
Muravyev, Dmitriy	Boston College
Murooka, Takeshi	University of Munich
Murphy, Dermot	University of Illinois at Chicago
Murray, Kyle	University of Alberta
Murray, Scott	University of Nebraska
Musalem, Andres	Duke University
Muslu, Volkan	University of Houston
Muthulingam, Suresh	Pennsylvania State University
Muthuraman, Kumar	University of Texas at Austin
Naecker, Jeffrey	Wesleyan University
Nagaraj, Abhishek	Massachusetts Institute of Technology
Nagarajan, Mahesh	University of British Columbia
Nagle, Frank	University of Southern California
Naik, Prasad	University of California, Davis
Najafi-Asadolahi, Sami	Santa Clara University
Nambisan, Satish	University of Wisconsin-Milwaukee
Nanda, Dhananjay	University of Miami
Nanda, Vikram	University of Texas at Dallas
Naranjo, Patricia	Rice University
Narasimhan, Chakravarthi	Washington University
Narayanan, Sridhar	Stanford University
Narayanan, Sriram	Michigan State University
Nasiry, Javad	Hong Kong University of Science and Technology
Nasser, Sherif	Cornell University
Natarajan, Karthik	Singapore University of Technology and Design
Natarajan, Karthik	University of Minnesota
Nathanson, Charles	Northwestern University
Natividad, Gabriel	University of Piura
Natter, Martin	Goethe University Frankfurt
Nau, Robert	Duke University
Naughton, James	Northwestern University
Naumovska, Ivana	INSEAD
Nave, Gideon	Caltech
Naveen, Lalitha	Temple University
Nazerzadeh, Hamid	University of Southern California
Neamtiu, Monica	University of Arizona
Neckermann, Susanne	Centre for European Economic Research
Nediak, Mikhail	Queen's University
Negoescu, Diana	University of Minnesota
Negro, Giacomo	Emory University
Nelson, Barry	Northwestern University
Nerkar, Atul	University of North Carolina
Netzer, Nick	University of Zurich
Nevskaya, Yulia	Olin Business School
Newberry, Peter	Pennsylvania State University
Nezlobin, Alexander	University of California, Berkeley
Ng, David	Cornell University
Ng, Jeffrey	Hong Kong Polytechnic University
Nguyen , Thanh	Purdue University
Nguyen, Quoc	University of Illinois at Chicago
Nguyen-Chyung, Amy	University of Michigan
Ni, Sophie	Hong Kong University of Science and Technology
Nian, Tingting	New York University
Nicolaides, Christos	Massachusetts Institute of Technology
Niculescu, Marius	Georgia Institute of Technology
Niedemayer, Andras	University of Mannheim
Niederhoff, Julie	Syracuse University
Nieken, Petra	Karlsruhe Institute of Technology
Niessen, Alexandra	University of Mannheim
Niessner, Marina	Yale University
Nijs, Vincent	University of California, San Diego
Nikiforakis, Nikos	New York University
Nikolaev, Valeri	University of Chicago
Nikolov, Boris	Ecole des HEC
Nini, Greg	Drexel University
Nocetti, Diego	Clarkson University
Noe, Thomas	University of Oxford
Nogales, Francisco Javier	Charles III University of Madrid
Non, Arjan	Maastricht University
Noor, Jawwad	Boston University
Norden, Lars	Fundacao Getulio Vargas
Norton, Michael	Harvard University
Nosenzo, Daniele	University of Nottingham
Noussair, Charles	University of Arizona
Novelli, Elena	City, University of London
Novemsky, Nathan	Yale University
Nozawa, Yoshio	Federal Reserve Board
Oakley, Jeremy	University of Sheffield
Obloj, Tomasz	HEC Paris
Ody-Brasier, Amandine	Yale University
Oehmke, Martin	Columbia University
Oery, Aniko	Yale University
Oettl, Alex	Georgia Institute of Technology
Oeystein, Daljord	University of Chicago
Officer, Micah	Loyola Marymount University
Ogneva, Maria	University of Southern California
Ogryczak, Włodzimierz	Warsaw University of Technology
Oh, Frederick Dongchuhl	Korea Advanced Institute of Science and Technology
Oh, Jaelynn	University of Utah
Oh, Joo Hee	Massachusetts Institute of Technology
Oh, Sewing	University of Illinois at Urbana-Champaign
Ohlmann, Jeffrey	The University of Iowa
Olivola, Christopher	Carnegie Mellon University
Olsen, Trond	Norwegian School of Economics
Onderstal, Sander	University of Amsterdam
O'Neill, Olivia	George Mason University
Ong, Qiyan	Nanyang Technological University
Ongena, Steven	University of Zurich
Opp, Marcus	University of California, Berkeley
Oraiopoulos, Nektarios	University of Cambridge
Orhun, A. Yesim	University of Michigan
Ormazabal, Gaizka	IESE Business School
Ormiston, Margaret	London Business School
Ornthanalai, Chayawat	University of Toronto
Ortega, Claudia	World Bank
Ortiz-Molina, Hernán	University of British Columbia
Ortoleva, Pietro	Columbia University
Orzen, Henrik	University of Mannheim
Osadchiy, Nikolay	Emory University
Osambela, Emilio	Carnegie Mellon University
Ostberg, Per	Institute for Banking and Finance
Ostler, James	University of Michigan
Otter, Thomas	Goethe University
Otto, Clemens	HEC Paris
Ouimet, Paige	University of North Carolina
Ovchinnikov, Anton	Queens University
Oveis, Christopher	University of California, San Diego
Ovtchinnikov, Alexei	HEC Paris
Owen-Smith, Jason	University of Michigan
Ozbay, Erkut	University of Maryland
Ozdagli, Ali	Federal Reserve Bank of Boston
Ozdenoren, Emre	London Business School
Ozel, Naim Bugra	University of Texas at Dallas
Ozkan-Seely, Gulru	University of Washington
Pachamanova, Dessislava	Babson College
Pacheco-de-Almeida, Goncalo	New York University
Page, Jeremy	Brigham Young University
Pai, Mallesh	University of Pennsylvania
Paik, Yongwook	Washington University in St. Louis
Palazzo, Berardino	Boston University
Palia, Darius	Rutgers University
Palley, Asa	Indiana University Bloomington
Palma, Marco	Texas A&M University
Palmer , Christopher	University of California, Berkeley
Palomeras, Neus	Charles III University of Madrid
Palomino, Francisco	Board of Governors of the Federal Reserve System
Panayides, Marios	University of Pittsburgh
Panayotov, George	Hong Kong University of Science and Technology
Pandelaere, Mario	Virginia Tech
Pang, Min-Seok	Temple University
Pang, Zhan	City University of Hong Kong
Panico, Claudio	Bocconi University
Paolella, Lionel	University of Cambridge
Papanastasiou, Yiangos	University of California Berkeley
Papier, Felix	ESSEC Business School
Pareek, Ankur	Rutgers University
Parker, Christopher	Pennsylvania State University
Parker, Rodney	University of Chicago
Parlaktürk, Ali	University of North Carolina at Chapel Hill
Parmigiani, Anne	University of Oregon
Parragh, Sophie	Vienna University of Economics and Business
Parsons, Christopher	University of California, San Diego
Pasupathy, Raghu	Virginia Tech
Patatoukas, Panos	University of California, Berkeley
Patel, Amrish	Goteborgs Universitet
Patrick, Jonathan	University of Ottawa
Patterson, Kelly	University of Southern California
Paul, Anand	University of Florida
Pauwels, Koen	Ozyegin University
Pavlin, Michael	Wilfrid Laurier University
Pawlina, Grzegorz	Lancaster University
Pedraza-Martinez, Alfonso	Indiana University Bloomington
Peeters, Ronald	Maastricht University
Pefecto, Hannah	University of California, Berkeley
Pekeč, Saša	Duke University
Pekgun, Pelin	University of South Carolina
Pence, Karen	Federal Reserve Board
Peng, Jiming	University of Houston
Peres, Renana	The Hebrew University
Perez Cavazos, Gerardo	Harvard University
Petacchi, Reining	Georgetown University
Petkova, Ralitsa	Case Western Reserve University
Petruzzi, Nicholas	Pennsylvania State University
Pettenuzzo, Davide	Brandeis University
Pham, Huyen	University of Paris Diderot
Piacentino, Giorgia	Washington University in Saint Louis
Piatti, Ilaria	University of Oxford
Piccotti, Louis	University at Albany
Pierce, Lamar	Washington University in St. Louis
Piezunka, Henning	INSEAD
Pinkowitz, Lee	Georgetown University
Pitesa, Marko	Singapore Management University
Pittman, Jeffrey	Memorial University
Pizzini, Mina	Texas State University
Placido, Laetitia	Baruch College
Pleskac, Timothy	Michigan State University
Plosser, Matthew	Federal Reserve Bank of New York
Plueger, Carolin	University of British Columbia
Plyakha, Yuliya	University of Luxembourg
Pogrebna, Ganna	University of Warwick
Pomeranz, Dina	Harvard University
Pontiff, Jeffrey	Boston College
[truncated: 941 more rows]
